# Supplementary material
Source: Springer Nature journal article supplement (https://www.springermedizin.de/resource/supplementary/12990_2013_596_MOESM3_ESM.pdf/9613586)

**A**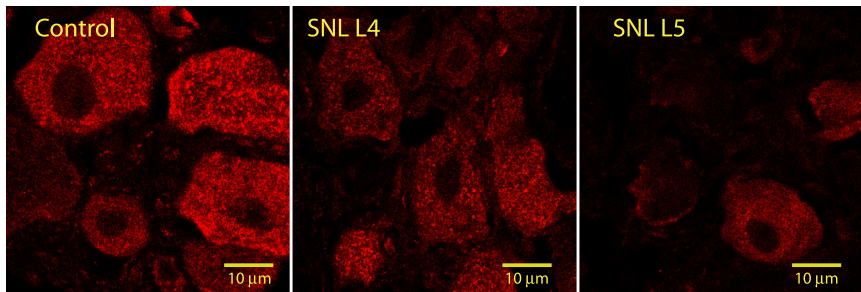**B**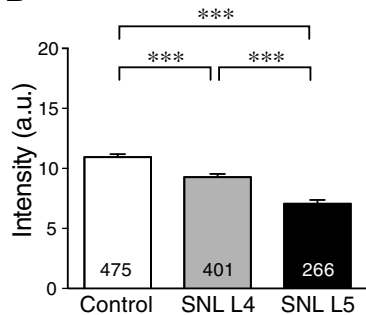**C**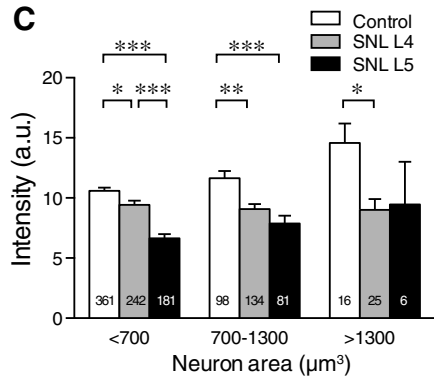

Supplement: MOESM3 [file 9613586]
